# Supplementary material for: Serological Evidence of Exposure to Saint Louis Encephalitis and West Nile Viruses in Horses of Rio de Janeiro, Brazil
Source: MDPI journal article supplement (doi:10.3390/v14112459), 2022-11-06
Supplement: s1 [file s1]

Table S1 Horses that were seropositive for WNV and SLEV in RJ.

| Sample ID | Collection date | Sex | Activities   | Age group | Mesoregions      | Municipalities | PRNT90 titer |      |      |        |     |      | Interpretation |
|-----------|-----------------|-----|--------------|-----------|------------------|----------------|--------------|------|------|--------|-----|------|----------------|
|           |                 |     |              |           |                  |                | WNV          | SLEV | ZIKV | DENV-1 | ILH |      |                |
| 2         | January, 2016   | F   | Reproduction | G 5       | North Fluminense | Macaé          | <10          | 20   | <10  | <10    | <10 | SLEV |                |
| 6         | January, 2016   | F   | Reproduction | G 5       | North Fluminense | Macaé          | <10          | 20   | <10  | <10    | <10 | SLEV |                |
| 9         | January, 2016   | F   | Reproduction | G 4       | North Fluminense | Macaé          | 10           | 40   | <10  | <10    | <10 | SLEV |                |
| 16        | January, 2016   | F   | Reproduction | G 5       | North Fluminense | Macaé          | 10           | 40   | <10  | <10    | <10 | SLEV |                |
| 22        | January, 2016   | F   | Reproduction | G 4       | North Fluminense | Macaé          | <10          | 20   | <10  | <10    | <10 | SLEV |                |
| 23        | January, 2016   | F   | Reproduction | G 5       | North Fluminense | Macaé          | <10          | 80   | <10  | <10    | <10 | SLEV |                |
| 24        | January, 2016   | F   | Reproduction | G 5       | North Fluminense | Macaé          | 320          | 40   | <10  | <10    | <10 | WNV  |                |
| 29        | January, 2016   | F   | Reproduction | G 5       | North Fluminense | Macaé          | <10          | 40   | <10  | <10    | <10 | SLEV |                |
| 31        | January, 2016   | F   | Reproduction | G 5       | North Fluminense | Macaé          | <10          | 40   | <10  | <10    | <10 | SLEV |                |
| 34        | January, 2016   | F   | Reproduction | G 5       | North Fluminense | Macaé          | 10           | 40   | <10  | <10    | <10 | SLEV |                |
| 38        | January, 2016   | F   | Reproduction | G 4       | North Fluminense | Macaé          | <10          | 20   | <10  | <10    | <10 | SLEV |                |
| 43        | January, 2016   | F   | Reproduction | G 3       | North Fluminense | Macaé          | 10           | 160  | <10  | <10    | <10 | SLEV |                |
| 44        | January, 2016   | F   | Reproduction | G 4       | North Fluminense | Macaé          | <10          | 20   | <10  | <10    | <10 | SLEV |                |
| 45        | January, 2016   | F   | Reproduction | G 4       | North Fluminense | Macaé          | <10          | 80   | <10  | <10    | <10 | SLEV |                |
| 48        | March, 2016     | F   | Reproduction | G 4       | North Fluminense | São Fidélis    | <10          | 40   | <10  | <10    | <10 | SLEV |                |
| 51        | March, 2016     | F   | Reproduction | G 4       | North Fluminense | São Fidélis    | <10          | 160  | <10  | <10    | <10 | SLEV |                |
| 52        | March, 2016     | F   | Sports       | G 2       | North Fluminense | São Fidélis    | 10           | 40   | <10  | <10    | <10 | SLEV |                |
| 53        | March, 2016     | F   | Reproduction | G 3       | North Fluminense | São Fidélis    | 10           | 80   | <10  | <10    | <10 | SLEV |                |
| 56        | March, 2016     | F   | Sports       | G 4       | North Fluminense | São Fidélis    | <10          | 40   | NA   | NA     | NA  | SLEV |                |

|     |             |   |              |     |                      |                         |     |     |     |     |     |      |
|-----|-------------|---|--------------|-----|----------------------|-------------------------|-----|-----|-----|-----|-----|------|
| 59  | March, 2016 | F | Sports       | G 4 | North Fluminense     | São Fidélis             | <10 | 20  | <10 | <10 | <10 | SLEV |
| 70  | March, 2016 | M | Sports       | G 2 | North Fluminense     | São Fidélis             | <10 | 40  | <10 | <10 | <10 | SLEV |
| 71  | April, 2016 | F | Reproduction | G 4 | North Fluminense     | Campos dos Goytacazes   | <10 | 160 | <10 | <10 | <10 | SLEV |
| 74  | April, 2016 | M | Reproduction | G 4 | North Fluminense     | Campos dos Goytacazes   | 20  | 80  | <10 | <10 | <10 | SLEV |
| 75  | April, 2016 | M | Reproduction | G 4 | North Fluminense     | Campos dos Goytacazes   | 10  | 160 | <10 | <10 | <10 | SLEV |
| 78  | April, 2016 | F | Reproduction | G 5 | Northwest Fluminense | Bom Jesus do Itabapoana | 10  | 80  | <10 | <10 | <10 | SLEV |
| 82  | April, 2016 | F | Recreation   | G 5 | Northwest Fluminense | Bom Jesus do Itabapoana | <10 | 160 | <10 | <10 | <10 | SLEV |
| 87  | April, 2016 | F | Recreation   | G 1 | Northwest Fluminense | Bom Jesus do Itabapoana | <10 | 40  | <10 | <10 | <10 | SLEV |
| 88  | April, 2016 | F | Recreation   | G 5 | Northwest Fluminense | Bom Jesus do Itabapoana | <10 | 40  | <10 | <10 | <10 | SLEV |
| 90  | April, 2016 | F | Recreation   | G 4 | Northwest Fluminense | Bom Jesus do Itabapoana | <10 | 80  | <10 | <10 | <10 | SLEV |
| 92  | April, 2016 | f | Recreation   | G 5 | Northwest Fluminense | Bom Jesus do Itabapoana | <10 | 160 | <10 | <10 | <10 | SLEV |
| 96  | April, 2016 | F | Sports       | G 3 | Northwest Fluminense | Bom Jesus do Itabapoana | 10  | 40  | <10 | <10 | <10 | SLEV |
| 106 | April, 2016 | F | Reproduction | G 4 | Northwest Fluminense | Bom Jesus do Itabapoana | <10 | 80  | <10 | <10 | <10 | SLEV |
| 108 | May, 2016   | M | Sports       | G 4 | Northwest Fluminense | Itaperuna               | <10 | 160 | <10 | <10 | <10 | SLEV |
| 109 | May, 2016   | F | Reproduction | G 5 | Northwest Fluminense | Itaperuna               | <10 | 80  | <10 | <10 | <10 | SLEV |
| 116 | May, 2016   | F | Sports       | G 4 | Northwest Fluminense | Itaperuna               | 10  | 80  | <10 | <10 | <10 | SLEV |
| 121 | May, 2016   | M | Sports       | G 3 | Northwest Fluminense | Itaperuna               | 10  | 160 | <10 | <10 | <10 | SLEV |

|            |               |   |              |     |                      |                         |      |     |     |     |     |      |
|------------|---------------|---|--------------|-----|----------------------|-------------------------|------|-----|-----|-----|-----|------|
| <b>123</b> | May, 2016     | M | Sports       | G 2 | Northwest Fluminense | Itaperuna               | <10  | 320 | <10 | <10 | <10 | SLEV |
| <b>124</b> | May, 2016     | F | Reproduction | G 4 | Northwest Fluminense | Itaperuna               | <10  | 40  | <10 | <10 | <10 | SLEV |
| <b>125</b> | May, 2016     | M | Sports       | G 3 | Northwest Fluminense | Itaperuna               | <10  | 20  | <10 | <10 | <10 | SLEV |
| <b>126</b> | May, 2016     | F | Sports       | G 4 | Northwest Fluminense | Itaperuna               | <10  | 80  | <10 | <10 | <10 | SLEV |
| <b>127</b> | May, 2016     | F | Sports       | G 2 | Northwest Fluminense | Itaperuna               | <10  | 20  | <10 | <10 | <10 | SLEV |
| <b>129</b> | May, 2016     | F | Sports       | G 4 | Northwest Fluminense | Itaperuna               | <10  | 80  | <10 | <10 | <10 | SLEV |
| <b>131</b> | May, 2016     | F | Sports       | G 4 | Northwest Fluminense | Itaperuna               | <10  | 20  | <10 | <10 | <10 | SLEV |
| <b>133</b> | May, 2016     | F | Reproduction | G 5 | Northwest Fluminense | Itaperuna               | <10  | 40  | <10 | <10 | <10 | SLEV |
| <b>134</b> | May, 2016     | F | Sports       | G 2 | Northwest Fluminense | Itaperuna               | <10  | 20  | <10 | <10 | <10 | SLEV |
| <b>136</b> | May, 2016     | F | Sports       | G 2 | Northwest Fluminense | Itaperuna               | <10  | 20  | <10 | <10 | <10 | SLEV |
| <b>155</b> | March, 2017   | F | Reproduction | G 4 | Northwest Fluminense | Bom Jesus do Itabapoana | 2560 | 10  | <10 | <10 | <10 | WNV  |
| <b>156</b> | March, 2017   | M | Work         | G 5 | Northwest Fluminense | Bom Jesus do Itabapoana | 320  | <10 | <10 | <10 | <10 | WNV  |
| <b>163</b> | January, 2016 | F | Sports       | G 2 | Coast                | Araruama                | <10  | 80  | <10 | <10 | <10 | SLEV |
| <b>172</b> | January, 2016 | F | Reproduction | G 4 | Coast                | Araruama                | <10  | 160 | <10 | <10 | <10 | SLEV |
| <b>173</b> | January, 2016 | F | Reproduction | G 4 | Coast                | Araruama                | 40   | <10 | <10 | <10 | <10 | WNV  |
| <b>179</b> | January, 2016 | F | Reproduction | G 3 | Coast                | Casimiro de Abreu       | <10  | 80  | <10 | <10 | <10 | SLEV |
| <b>182</b> | January, 2016 | F | Reproduction | G 3 | Coast                | Casimiro de Abreu       | <10  | 20  | <10 | <10 | <10 | SLEV |
| <b>183</b> | January, 2016 | F | Reproduction | G 3 | Coast                | Casimiro de Abreu       | <10  | 20  | <10 | <10 | <10 | SLEV |
| <b>186</b> | January, 2016 | F | Reproduction | G 4 | Coast                | Casimiro de Abreu       | <10  | 40  | <10 | <10 | <10 | SLEV |
| <b>187</b> | January, 2016 | F | Reproduction | G 4 | Coast                | Casimiro de Abreu       | <10  | 40  | <10 | <10 | <10 | SLEV |

|            |                |   |              |     |                   |                   |     |     |     |     |     |      |
|------------|----------------|---|--------------|-----|-------------------|-------------------|-----|-----|-----|-----|-----|------|
| <b>189</b> | January, 2016  | F | Reproduction | G4  | Coast             | Casimiro de Abreu | <10 | 40  | <10 | <10 | <10 | SLEV |
| <b>190</b> | January, 2016  | F | Reproduction | G4  | Coast             | Casimiro de Abreu | 10  | 80  | <10 | <10 | <10 | SLEV |
| <b>198</b> | January, 2016  | F | Reproduction | G5  | Coast             | Casimiro de Abreu | 10  | 80  | <10 | <10 | <10 | SLEV |
| <b>204</b> | January, 2016  | M | Sports       | G3  | Coast             | Saquarema         | <10 | 80  | <10 | <10 | <10 | SLEV |
| <b>209</b> | January, 2016  | F | Sports       | G2  | Coast             | Saquarema         | <10 | 20  | <10 | <10 | <10 | SLEV |
| <b>214</b> | January, 2016  | F | Sports       | G3  | Coast             | Saquarema         | <10 | 40  | <10 | <10 | <10 | SLEV |
| <b>217</b> | January, 2016  | F | Reproduction | G4  | Coast             | Saquarema         | 40  | <10 | <10 | <10 | <10 | WNV  |
| <b>220</b> | January, 2016  | F | Reproduction | G3  | Coast             | Saquarema         | 10  | 40  | <10 | <10 | <10 | SLEV |
| <b>222</b> | January, 2016  | F | Reproduction | G4  | Coast             | Saquarema         | 10  | 40  | <10 | <10 | <10 | SLEV |
| <b>223</b> | January, 2016  | F | Reproduction | G4  | Coast             | Saquarema         | 10  | 80  | <10 | <10 | <10 | SLEV |
| <b>224</b> | January, 2016  | F | Reproduction | G4  | Coast             | Saquarema         | <10 | 160 | <10 | <10 | <10 | SLEV |
| <b>228</b> | January, 2016  | F | Reproduction | G4  | Coast             | Saquarema         | 40  | 160 | <10 | <10 | <10 | SLEV |
| <b>238</b> | November, 2015 | M | Reproduction | G5  | Centre Fluminense | Cantagalo         | <10 | 80  | <10 | <10 | <10 | SLEV |
| <b>240</b> | November, 2015 | M | Reproduction | G 4 | Centre Fluminense | Cantagalo         | <10 | 20  | <10 | <10 | <10 | SLEV |
| <b>245</b> | November, 2015 | M | Sports       | G 3 | Centre Fluminense | Cantagalo         | <10 | 40  | <10 | <10 | <10 | SLEV |
| <b>247</b> | November, 2015 | F | Sports       | G 2 | Centre Fluminense | Cantagalo         | <10 | 40  | <10 | <10 | <10 | SLEV |
| <b>248</b> | November, 2015 | M | Sports       | G 3 | Centre Fluminense | Cantagalo         | 80  | 320 | <10 | <10 | <10 | SLEV |
| <b>249</b> | November, 2015 | M | Sports       | G 1 | Centre Fluminense | Cantagalo         | <10 | 40  | <10 | <10 | <10 | SLEV |
| <b>255</b> | January, 2016  | M | Sports       | G 4 | Centre Fluminense | Paraíba do Sul    | 20  | 80  | <10 | <10 | <10 | SLEV |
| <b>258</b> | January, 2016  | M | Sports       | G 4 | Centre Fluminense | Paraíba do Sul    | <10 | 20  | <10 | <10 | <10 | SLEV |
| <b>261</b> | January, 2016  | M | Sports       | G 4 | Centre Fluminense | Paraíba do Sul    | <10 | 320 | <10 | <10 | <10 | SLEV |

|            |                |   |              |     |                   |                      |     |     |     |     |     |      |
|------------|----------------|---|--------------|-----|-------------------|----------------------|-----|-----|-----|-----|-----|------|
| <b>266</b> | January, 2016  | F | Sports       | G 4 | Centre Fluminense | Paraíba do Sul       | 20  | 160 | <10 | <10 | <10 | SLEV |
| <b>269</b> | January, 2016  | F | Reproduction | G 5 | Centre Fluminense | Areal                | 10  | 40  | <10 | <10 | <10 | SLEV |
| <b>270</b> | January, 2016  | F | Reproduction | G 5 | Centre Fluminense | Areal                | 10  | 40  | <10 | <10 | <10 | SLEV |
| <b>275</b> | January, 2016  | M | Recreation   | G 5 | Centre Fluminense | Areal                | <10 | 160 | <10 | <10 | <10 | SLEV |
| <b>277</b> | January, 2016  | F | Recreation   | G 5 | Centre Fluminense | Areal                | <10 | 80  | <10 | <10 | <10 | SLEV |
| <b>278</b> | January, 2016  | M | Recreation   | G 5 | Centre Fluminense | Areal                | 20  | 80  | <10 | <10 | <10 | SLEV |
| <b>285</b> | November, 2015 | F | Sports       | G 2 | Metropolitan      | Cachoeiras de Macacu | <10 | 20  | <10 | <10 | <10 | SLEV |
| <b>287</b> | November, 2015 | M | Sports       | G 5 | Metropolitan      | Cachoeiras de Macacu | <10 | 160 | <10 | <10 | <10 | SLEV |
| <b>311</b> | November, 2015 | M | Sports       | G 3 | Metropolitan      | Cachoeiras de Macacu | 10  | 80  | <10 | <10 | <10 | SLEV |
| <b>322</b> | November, 2015 | M | Sports       | G 2 | Metropolitan      | Cachoeiras de Macacu | <10 | 20  | <10 | <10 | <10 | SLEV |
| <b>338</b> | May, 2016      | M | Reproduction | G 3 | Metropolitan      | Duque de Caxias      | <10 | 80  | <10 | <10 | <10 | SLEV |
| <b>345</b> | May, 2016      | F | Reproduction | G 5 | Metropolitan      | Duque de Caxias      | <10 | 20  | <10 | <10 | <10 | SLEV |
| <b>356</b> | August, 2015   | M | Sports       | G 3 | Metropolitan      | Teresópolis          | <10 | 20  | <10 | <10 | <10 | SLEV |
| <b>358</b> | August, 2015   | M | Sports       | G 3 | Metropolitan      | Teresópolis          | <10 | 20  | <10 | <10 | <10 | SLEV |
| <b>361</b> | August, 2015   | M | Sports       | G 3 | Metropolitan      | Teresópolis          | 10  | 80  | <10 | <10 | <10 | SLEV |
| <b>364</b> | August, 2015   | M | Sports       | G 3 | Metropolitan      | Teresópolis          | <10 | 160 | <10 | <10 | <10 | SLEV |
| <b>372</b> | August, 2015   | M | Sports       | G 3 | Metropolitan      | Teresópolis          | <10 | 20  | <10 | <10 | <10 | SLEV |

WNV- West Nile virus; SLEV- Saint Louis encephalitis virus; ILHV- Ilheus virus; DENV-1- dengue virus serotype 1; ZIKV- Zika virus; F-Female; M-Male; G - Group

*Table S2 Horses that were undifferentiated flavivirus in RJ.*

| Sample ID | Collection date | Sex | Activities | Age group | Mesoregions | Municipalities | PRNT90 titer |      |      |        |      | Interpretation |
|-----------|-----------------|-----|------------|-----------|-------------|----------------|--------------|------|------|--------|------|----------------|
|           |                 |     |            |           |             |                | WNV          | SLEV | ZIKV | DENV-1 | ILHV |                |

|            |               |   |              |     |                      |                         |    |    |     |     |     |                             |
|------------|---------------|---|--------------|-----|----------------------|-------------------------|----|----|-----|-----|-----|-----------------------------|
| <b>1</b>   | January, 2016 | F | Reproduction | G 5 | North Fluminense     | Macaé                   | 10 | 20 | <10 | <10 | <10 | Undifferentiated flavivirus |
| <b>17</b>  | January, 2016 | F | Reproduction | G 4 | North Fluminense     | Macaé                   | 10 | 20 | <10 | <10 | <10 | Undifferentiated flavivirus |
| <b>25</b>  | January, 2016 | F | Reproduction | G 4 | North Fluminense     | Macaé                   | 20 | 40 | <10 | <10 | <10 | Undifferentiated flavivirus |
| <b>26</b>  | January, 2016 | F | Reproduction | G 5 | North Fluminense     | Macaé                   | 80 | 40 | <10 | <10 | <10 | Undifferentiated flavivirus |
| <b>32</b>  | January, 2016 | F | Reproduction | G 5 | North Fluminense     | Macaé                   | 10 | 10 | <10 | <10 | <10 | Undifferentiated flavivirus |
| <b>33</b>  | January, 2016 | F | Reproduction | G 4 | North Fluminense     | Macaé                   | 20 | 40 | <10 | <10 | <10 | Undifferentiated flavivirus |
| <b>60</b>  | March, 2016   | F | Sports       | G 4 | North Fluminense     | São Fidélis             | 10 | 20 | <10 | <10 | <10 | Undifferentiated flavivirus |
| <b>64</b>  | March, 2016   | F | Reproduction | G 3 | North Fluminense     | São Fidélis             | 10 | 10 | <10 | <10 | <10 | Undifferentiated flavivirus |
| <b>72</b>  | April, 2016   | M | Reproduction | G 4 | North Fluminense     | Campos dos Goytacazes   | 20 | 20 | <10 | <10 | <10 | Undifferentiated flavivirus |
| <b>85</b>  | April, 2016   | F | Recreation   | G 4 | Northwest Fluminense | Bom Jesus do Itabapoana | 10 | 10 | <10 | <10 | <10 | Undifferentiated flavivirus |
| <b>151</b> | April, 2016   | F | Reproduction | G 3 | Northwest Fluminense | Bom Jesus do Itabapoana | 10 | 10 | <10 | <10 | <10 | Undifferentiated flavivirus |
| <b>154</b> | April, 2016   | F | Reproduction | G 4 | Northwest Fluminense | Bom Jesus do Itabapoana | 20 | 20 | NA  | NA  | NA  | Undifferentiated flavivirus |
| <b>111</b> | May, 2016     | F | Sports       | G 4 | Northwest Fluminense | Itaperuna               | 20 | 40 | <10 | <10 | <10 | Undifferentiated flavivirus |
| <b>113</b> | May, 2016     | F | Sports       | G 5 | Northwest Fluminense | Itaperuna               | 10 | 10 | <10 | <10 | <10 | Undifferentiated flavivirus |
| <b>119</b> | May, 2016     | F | Sports       | G 2 | Northwest Fluminense | Itaperuna               | 20 | 40 | <10 | <10 | <10 | Undifferentiated flavivirus |
| <b>122</b> | May, 2016     | M | Sports       | G 4 | Northwest Fluminense | Itaperuna               | 10 | 10 | <10 | <10 | <10 | Undifferentiated flavivirus |
| <b>128</b> | May, 2016     | F | Sports       | G 4 | Northwest Fluminense | Itaperuna               | 10 | 10 | <10 | <10 | <10 | Undifferentiated flavivirus |
| <b>194</b> | January, 2016 | F | Reproduction | G5  | Coast                | Casimiro de Abreu       | 10 | 10 | <10 | <10 | <10 | Undifferentiated flavivirus |
| <b>196</b> | January, 2016 | F | Reproduction | G5  | Coast                | Casimiro de Abreu       | 10 | 10 | <10 | <10 | <10 | Undifferentiated flavivirus |
| <b>213</b> | January, 2016 | F | Sports       | G3  | Coast                | Saquarema               | 10 | 20 | <10 | <10 | <10 | Undifferentiated flavivirus |
| <b>215</b> | January, 2016 | F | Sports       | G3  | Coast                | Saquarema               | 20 | 10 | <10 | <10 | <10 | Undifferentiated flavivirus |

|            |                |   |              |     |                   |                      |    |    |     |     |     |                             |
|------------|----------------|---|--------------|-----|-------------------|----------------------|----|----|-----|-----|-----|-----------------------------|
| <b>219</b> | January, 2016  | F | Reproduction | G4  | Coast             | Saquarema            | 80 | 40 | <10 | <10 | <10 | Undifferentiated flavivirus |
| <b>262</b> | January, 2016  | M | Sports       | G 4 | Centre Fluminense | Paraíba do Sul       | 10 | 10 | <10 | <10 | <10 | Undifferentiated flavivirus |
| <b>279</b> | January, 2016  | F | Recreation   | G 5 | Centre Fluminense | Areal                | 10 | 10 | <10 | <10 | <10 | Undifferentiated flavivirus |
| <b>310</b> | November, 2015 | F | Sports       | G 3 | Metropolitan      | Cachoeiras de Macacu | 40 | 40 | <10 | <10 | <10 | Undifferentiated flavivirus |
| <b>328</b> | November, 2015 | M | Sports       | G 2 | Metropolitan      | Cachoeiras de Macacu | 20 | 40 | <10 | <10 | <10 | Undifferentiated flavivirus |
| <b>329</b> | November, 2015 | F | Reproduction | G 4 | Metropolitan      | Cachoeiras de Macacu | 20 | 40 | <10 | <10 | <10 | Undifferentiated flavivirus |
| <b>337</b> | May, 2016      | F | Reproduction | G 5 | Metropolitan      | Duque de Caxias      | 10 | 10 | <10 | <10 | <10 | Undifferentiated flavivirus |
| <b>353</b> | August, 2015   | M | Sports       | G 3 | Metropolitan      | Teresópolis          | 10 | 10 | <10 | <10 | <10 | Undifferentiated flavivirus |
| <b>373</b> | August, 2015   | M | Sports       | G 3 | Metropolitan      | Teresópolis          | 20 | 20 | <10 | <10 | <10 | Undifferentiated flavivirus |
| <b>429</b> | May, 2016      | M | Sports       | G 5 | South Fluminense  | Resende              | 80 | 40 | <10 | <10 | <10 | Undifferentiated flavivirus |
| <b>435</b> | May, 2016      | F | Reproduction | G 5 | South Fluminense  | Resende              | 40 | 40 | <10 | <10 | <10 | Undifferentiated flavivirus |

WNV- West Nile virus; SLEV- Saint Louis encephalitis virus; ILHV- Ilheus virus; DENV-1- dengue virus serotype 1; ZIKV- Zika virus; F-Female; M-Male; G - Group
